# Supplementary material for: Cold plasma treatment for cotton seed germination improvement
Source: PubMed Central journal article supplement (PMC6158256; doi:10.1038/s41598-018-32692-9), 2018-09-26
Supplement: 41598_2018_32692_MOESM1_ESM.pdf [file 41598_2018_32692_MOESM1_ESM.pdf]

## Supplementary Material

### Cold plasma treatment for cotton seed germination improvement

Gerard J.J.B. de Groot, Andy Hundt, Anthony B. Murphy, Michael P. Bange and Anne Mai-Prochnow

The results of the imbibitional chilling tests are given in Table S1.

Table S1. Results of imbibitional chilling tests, giving mean germination percentage for each sample, and standard deviation from the mean.

| Sample              | Mean germination (%) | SD (%) |
|---------------------|----------------------|--------|
| Control             | 78.1                 | 11.5   |
| 3 min air plasma    | 80.0                 | 5.3    |
| 27 min air plasma   | 81.9                 | 13.6   |
| 81 min argon plasma | 82.3                 | 6.3    |

The results of the electrolyte leakage test are given in Table S2.

Table S2. Results of electrolyte leakage test, giving mean conductivity for each sample, and standard deviation from the mean.

| Sample              | Mean conductivity ( $\mu\text{S}$ ) | SD ( $\mu\text{S}$ ) |
|---------------------|-------------------------------------|----------------------|
| Control             | 425                                 | 36                   |
| 3 min air plasma    | 475                                 | 35                   |
| 27 min air plasma   | 425                                 | 11                   |
| 81 min argon plasma | 458                                 | 71                   |
